# Supplementary material for: The Impact of Acetyl-CoA and Aspartate Shortages on the N-Acetylaspartate Level in Different Models of Cholinergic Neurons
Source: MDPI journal article supplement (doi:10.3390/antiox9060522), 2020-06-13
Supplement: s1 [file s1]

## Supplement 1. Protocols for enzymatic assays

**Aconitase** (Aco, EC 4.2.1.3) activity was determined using NADPH / NADP conversion technique, at  $\lambda = 340$  nm and 37 °C. The reaction buffer contained 0.05 M Tris-HCl (pH = 7.4), 2 mM MgCl<sub>2</sub>, 0.1 mM NADP, 1 U IDH-NADP and 100 µg of cell homogenate protein in a final volume of 0.7 mL. Enzymatic assay was initiated by the addition of 10 µL of 10 mM *cis*-aconitane (10 µL) [16].

**Aspartate aminotransferase** (GOT, EC 2.6.1.1) activity was determined using DTNB/TNB reduction technique, at 412 nm and 37°C. 1 mL of reaction buffer contained 0.1 M Tris-HCl (pH=8.3), 1 mM sodium-EDTA, 0.018 mM acetyl-CoA, 50 mM aspartate, 0.1 mM DTNB, 2U citrate synthase (SC, EC 4.1.3.7) and 20 µg of cell homogenate protein. Enzymatic assay was initiated by the addition of 10 µL of 0.1 mM  $\alpha$ -ketoglutarate [17].

**Aspartate N-acetyltransferase** (Asp-NAT, 2.3.1.17) activity was determined using radiochemical assay to measure the level of produced [<sup>14</sup>C]-N-acetylaspartate (<sup>14</sup>C-NAA). The reaction buffer contained 10 mM potassium phosphate, 20 mM potassium-HEPES (pH=7.1), 1 mM MgCl<sub>2</sub>, 200 µM acetyl-CoA, 50 µM aspartate, 1 µM L-[U-<sup>14</sup>C]aspartate and 100 µg of cell homogenate protein in a final volume of 0.2 mL (incubation conditions: 30 min, 37 °C, gentle shaking). The reaction was stopped by thermic shock (5 min, 80 °C) and dilution (1 mL of 5 mM potassium-HEPES, pH=7.1). The final product (<sup>14</sup>C-NAA) was isolated on DSC-SAX-SPE column (Discovery, Cat# 52664-U). Mobile phases: wash 1 (2 mL of 5 mM potassium-HEPES, (pH=7.1)), wash 2 (5 mL of 0.15 M NaCl), and elution (5 mL of 0.3 M NaCl). The radioactivity of the eluent (2 mL) was counted for 10 min in the presence of 10 mL Ultima Gold™ liquid scintillator (Perkin Elmer, Cat# 6013321). Total radioactivity of substrate (L-[U-<sup>14</sup>C]aspartate) has been measured in 1,4-dioxan-based scintillator instead of Ultima Gold™ scintillator [18].

**Citrate synthase** (SC, EC 4.1.3.7) activity was determined using DTNB/TNB reduction technique, at 412 nm and 37 °C. 1 mL of reaction buffer contained 0.1 M Tris-HCl (pH=8.0), 0.015 mM acetyl-CoA, 0.2 mM DTNB and 20 µg of cell homogenate protein. Enzymatic assay was initiated by the addition of 10 µL of 0.2 mM oxaloacetate [20].

**Choline acetylase** (ChAT, EC 2.3.1.6) activity was determined using radiochemical assay to measure the level of produced [<sup>14</sup>C]-acetylcholine (<sup>14</sup>C-ACh). The reaction buffer contained 50 mM sodium phosphate buffer (pH = 7.4), 1 mM EDTA, 0.6 mM NaCl, 0.2 mM eserine, [1-<sup>14</sup>C]-acetyl-CoA (0.43 nmol / sample, 0.025 µCi), 0.05 M choline and 20 µg of cell homogenate protein in a final volume of 0.01 mL (incubation conditions: 30 min, 30 °C, gentle shaking). Reaction was stopped by dilution in ice – cold buffer having 10 mM sodium phosphate buffer (pH = 7.4), 0.5% 4-tetraphenylborate sodium, 25% acetonitrile in total volume of 6 mL. Finally, radioactive <sup>14</sup>-C ACh has been extracted in POPOP / PPO / toluene liquid scintillator and measured for 10 min. Total radioactivity of substrate ([1-<sup>14</sup>C]-acetyl-CoA) has been measured in 1,4-dioxan-based scintillator instead [19].

**Glutamate dehydrogenase** (GDH, EC 1.4.1.2) activity was determined using NADPH/NADP conversion technique, at 340 nm and 37 °C. 1 mL of reaction buffer contained 0.1 M Tris-HCl (pH=8.3), 3.3. M NH<sub>4</sub>Cl, 7.5 mM NADPH and 20 µg of cell homogenate protein. Enzymatic assay was initiated by the addition of 10 µL of 0.1 M  $\alpha$ -ketoglutarate [21].

**Hexokinase** (Hex, EC 2.7.1.1) activity was determined using NADPH / NADP conversion technique, at  $\lambda = 340$  nm and 37 °C. 1 mL of reaction buffer contained 0.1 M Tris-HCl (pH = 7.4), 5 mM glucose, 0.2 mM MgCl<sub>2</sub>, 0.25 mM NADH, 1 U glucose-6-phosphate dehydrogenase (G-6-PDH, EC 1.1.1.49) and 20 µg of cell homogenate protein. Enzymatic assay was initiated by the addition of 10 µL of 0.1 M pyruvate [22].

**Isocitrate dehydrogenase** (IDH, EC 1.1.1.42) activity was determined using NADPH / NADP conversion technique, at  $\lambda = 340$  nm and 37 °C. The reaction buffer contained 0.05 M Tris-HCl (pH = 7.4), 0.6 mM MgCl<sub>2</sub>, 0.5 mM NADP and 100 µg of cell homogenate protein in a final volume of 0.7 mL. Enzymatic assay was initiated by the addition of 10 µL of 10 mM isocitrate [23].

**Lactate dehydrogenase or LDH in media assay** (LDH, EC 1.1.1.27) activity was determined using NADH / NAD conversion technique, at  $\lambda = 340$  nm and 37 °C. 1 mL of reaction buffer contained 0.1 M Tris-HCl (pH = 7.4), 0.2 mM NADH and 20 µg of cell homogenate protein (or 0 – 200 µL of culture

media, for cell viability test assay). Enzymatic assay was initiated by the addition of 10 µL of 0.1 M ATP. To establish total LDH in media activity, Triton X-100 in final concentration 0.2% was added to two culture dishes with untreated cells. Dishes were incubated for the additional 2 h in usual culture conditions. Eventually, LDH in media activity from each experimental time point was divided by total LDH activity and express as a per cents of total LDH activity [24].

**Pyruvate dehydrogenase complex** (PDHC, EC 1.2.4.1.) activity was determined using cycling method. In each lysate (100 µg of cell homogenate protein) the following reactions were performed: (1) citrate production, (2) citrate level measurement. The first reaction (1) was carried out in 250 µL for 30 min (37 °C, gentle shaking), buffer contained 0.1 M Tris-HCl (pH = 8.3), 2 mM MgCl<sub>2</sub>, 10 mM dithiothreitol, 10 mM pyruvate, 2 mM thiamine pyrophosphate, 0.2 mM CoA, 2.5 mM oxaloacetate, 2 mM NAD, 0.15 U citrate synthase (EC 4.1.3.7). Reaction was terminated by thermic shock (10 min, 100 °C). Finally, the produced citrate level was determined using NADH / NAD conversion technique, at λ = 340 nm and 37 °C. The reaction buffer contained 0.1 M Tris-HCl (pH = 7.4), 0.1 mM NADH, 0.2 U malate dehydrogenase (EC 1.1.1.37) and 100 µL of achieved supernatant in a final volume of 0.7 mL. The assay was initiated by the addition of 10 µL of 0.1 U citrate lyase (EC 4.1.3.6) [25].

**Malate dehydrogenase** (MDH, EC 1.1.1.37) activity was determined using NADH/NAD conversion technique, at 340 nm and 37 °C. 1 mL of reaction buffer contained 0.1 M Tris-HCl (pH=7.4), 3 mM sodium-EDTA, 0.25 mM NADH and 20 µg of cell homogenate protein. Enzymatic assay was initiated by the addition of 10 µL of 0.15 M oxaloacetate [26].

## Supplement 2. Protocols for metabolic assays

**Acetoacetate** level was determined using NADH/NAD conversion technique, at 340 nm and 37°C. 1 mL of reaction buffer contained 0.1 M TRIS-HCl buffer (pH=7.4), 0.2 mM NADH and 20 µL of urine. Reaction was initiated by the 10 µL addition of 0.25 U β-hydroxybutyrate dehydrogenase [27].

**Acetyl-CoA** level was determined using the cycling method described previously [15]. In each neutralized supernatant (40 µg of cell homogenate protein), the following reactions were performed: (1) coenzyme-A removal, (2) acetyl-CoA level enhancement, (3) citrate level measurement. The first reaction (1) was carried out in 50 µL for 2 h (room temperature, gentle shaking). The first reaction buffer contained 0.1 M Tris-HCl (pH=7.4), 1 mM maleic anhydride (dissolved in diethyl ether). The second reaction was started by the addition of 50 µL of the second reaction buffer (50 mM Tris-HCl (pH=7.4), 5 mM NH<sub>4</sub>Cl, 0.01% albumin, 1.2 mM oxaloacetate, 2 mM acetyl phosphate, 1 U phosphotransacetylase, and 0.12 U citrate synthase). The reaction (30 °C, gentle shaking) lasting for 100 min was terminated by thermic shock (10 min, 100 °C). Finally, the produced citrate was determined using NADH/NAD conversion technique, at 340 nm and 37 °C. The reaction buffer contained 0.1 M Tris-HCl (pH=7.4), 0.1 mM NADH, 0.2 U MDH and obtained supernatant in a final volume of 0.7 mL. The assay was initiated by the addition of 10 µL of 0.1 U citrate lyase (EC 4.1.3.6) [15].

**Acetylcholine release** were assayed by luminescence. After experimental step, each sample (200 µL) was spun down (5 min, 10 000 xg). Acetylcholine release was measured in a supernatant. The reaction buffer contained: 67 mM glycine-NaOH buffer (pH=8.3), 0.01 mM luminol, 10 U horseradish peroxidase (EC 1.11.1.7), 0.5 U choline oxidase (EC 1.1.3.17) and 20 µL of sample. Reaction was initiated by the 10 µL addition of 5 U acetylcholinesterase (EC 3.1.1.7) [27].

**Aspartate** level was determined using NADH/NAD conversion technique at 340 nm and 37 °C. The reaction buffer contained 70 mM sodium/potassium-phosphate buffer (pH=7.2), 10 mM α-ketoglutarate, 0.2 mM NADH and 100 µg of cell homogenate protein in a final volume of 0.7 mL. The assay was initiated by the addition of 10 µL of 15 U MDH and 0.6 U GOT [28].

**ATP** levels were assayed by RP-HPLC method. Briefly, supernatant (pH = 7.0) was centrifuged at Micro Spin filter (Teflon membrane, Ø 0.22 mm, C18, Cat# CIPT-02). 25 µL of supernatant (50 µg of cell homogenate protein) was analyzed in a pre-column protected Hypersil™ ODS C18RP column (150 x 4.6, i.d., MZ-Analysentechnik GmbH, Cat# 6045) by Flexar HPLC system (Perkin Elmer). Mobile phase A (10mM TBAHS / 100mM phosphate buffer, pH = 7.0) and mobile phase B (30% methanol) were mixed with flow rate: 1 mL/min under gradient program: 0 – 10 min (98% mobile phase A), 10 – 25 min (linear gradient from 98% to 0% mobile phase A), 25 – 40 min (0% mobile phase A), 40 – 45 (linear gradient from 0% to 98% mobile phase A). Separation time:  $t_{ATP}$  = 22.0 min [29].

**β-hydroxybutyrate** level was determined using NADH / NAD conversion technique, at λ = 340 nm and 37 °C. 1 mL of reaction buffer contained 0.08 M glycine-NaOH buffer (pH = 9.5), 0.2 mM NAD and 20 µg of cell homogenate protein. Reaction was initiated by the addition of 10 µL of 0.25 U β-hydroxybutyrate dehydrogenase [27].

**Lactate** level was determined using NADH / NAD conversion technique, at λ = 340 nm and 37 °C. 1 mL of reaction buffer contained 0.08 M glycine-NaOH buffer (pH = 9.5), 0.2 mM NAD and 20 µg of cell homogenate protein. Reaction was initiated by the addition of 10 µL of 4 U lactate dehydrogenase [27].

**Malate** levels were determined using NADH/NAD conversion technique, at 340 nm and 37 °C. 1 mL of reaction buffer contained 0.1 M glycine-NaOH buffer (pH = 10.0), 0.1 M glutamic acid, 0.2 mM NAD and 100 µg of cell homogenate protein. The assay was initiated by the addition of 10 µL of 8 U MDH with 0.5 U GOT [28].

**N-acetylaspargate (NAA)** level was assayed by HPLC method described previously [4]. Briefly, supernatant (pH = 2.5) was centrifuged at Micro Spin filter (Teflon membrane, Ø 0.22 mm, C18, Cat# CIPT-02). 90 µL of supernatant (90 µg of cell homogenate protein) was analyzed in a Synergy 4u Fusion RP 80A column (250 x 4.6, Phenomenex, Cat# 00G-4424-EO) by HPLC A-200 system (Perkin Elmer). The assay was performed under isocratic conditions (mobile phase: 0.1% H<sub>3</sub>PO<sub>4</sub> / 1% methanol / water, pH = 2.5) with flow rate: 0.9 mL/min and separation time: 20 min;  $t_{NAA}$  = 7.0 min (λ = 210 nm) [4].

124 **Oxaloacetate** and **pyruvate** levels were determined using NADH/NAD conversion technique, at 340  
125 nm and 37 °C. 1 mL of reaction buffer contained 0.1 M Tris-HCl (pH=7.4), 3 mM sodium-EDTA, 0.2 mM  
126 NADH and 100 µg of cell homogenate protein. The assay was initiated by the addition of 10 µL of 1.5  
127 U MDH (for oxaloacetate assay) or 4 U LDH (for pyruvate assay) [28].  
128 **Thiobarbituric acid reactive substances (TBARS)** were used to track the lipid peroxidation products  
129 at  $\lambda = 535$  nm in room temperature. Briefly, 0.5 mg of cell homogenate protein was deproteinized by  
130 10% trichloroacetic acid in a final volume of 0.6 mL (10 min, 4 °C, gentle shaking). Next, each sample  
131 was enriched by 0.2 mL of 2% thiobarbituric acid and heated for 20 min at 100 °C [30].  
132

| NAME                                   | COMPANY       | Cat#         |
|----------------------------------------|---------------|--------------|
| 0.4% Trypan Blue solution              | Sigma Aldrich | T8154        |
| 1,4-Dioxan                             | Sigma Aldrich | 292300119    |
| 2-Mercaptoethanol                      | Sigma Aldrich | M3148        |
| 2-aminoethyl diphenylborinate (2-APB)  | Sigma Aldrich | D9754        |
| Acetic acid                            | POCH          | 568760114    |
| Acetonitrile                           | POCH          | 10265456     |
| Acetyl-CoA [acetyl-1-14-C] 50 $\mu$ Ci | Perkin Elmer  | NEC313050UC  |
| ADP sodium salt                        | Sigma Aldrich | A6646        |
| Albumin, bovine serum (BSA)            | Sigma Aldrich | A4503        |
| Amphotericin B                         | Sigma Aldrich | A9528        |
| Aspartic acid L-[U-14-C] 50 $\mu$ Ci   | Perkin Elmer  | NEC268E050UC |
| ATP disodium salt                      | Sigma Aldrich | A2383        |
| $\beta$ -hydroxybutyrate dehydrogenase | Sigma Aldrich | H9408        |
| BCIP                                   | Sigma Aldrich | B6149        |
| Brilliant blue G                       | Sigma Aldrich | 27815        |
| CaCl <sub>2</sub>                      | Sigma Aldrich | C5426        |
| CHAPS                                  | Sigma Aldrich | C9426        |
| Choline chloride                       | Sigma Aldrich | C7527        |
| Chloroform                             | POCH          | BA4431116    |
| <i>cis</i> -Aconitic acid              | Sigma Aldrich | A3412        |
| Citrate lyase (CL)                     | Sigma Aldrich | C0897        |
| Citrate synthase (CS)                  | Sigma Aldrich | C3260        |
| Coenzyme A sodium salt (CoA)           | Sigma Aldrich | C3144        |
| CuCl <sub>2</sub>                      | Sigma Aldrich | 751944       |
| D-Glucose                              | Sigma Aldrich | G5767        |
| Dibutyl- <i>l</i> -cAMP                | Sigma Aldrich | D0627        |
| Diethyl ether                          | Sigma Aldrich | 309966       |
| Digitonin                              | Sigma Aldrich | D5628        |
| Dithiotreitol (DTT)                    | Sigma Aldrich | D9779        |
| Dulbecco's Modified Eagle's Medium     | Sigma Aldrich | D5671        |
| DTNB                                   | Sigma Aldrich | D8130        |
| EDTA                                   | Sigma Aldrich | E1644        |
| Eserine salicylate salt                | Sigma Aldrich | 45720        |
| Ethanol                                | Sigma Aldrich | 493511       |
| Fetal bovine serum (FBS)               | Sigma Aldrich | F9665        |
| Glucose-6-phosphate dehydrogenase      | Sigma Aldrich | G8404        |
| Glutamic-Oxalacetic Transaminase (GOT) | Sigma Aldrich | G2751        |
| Glycerol                               | Sigma Aldrich | G2025        |
| Glycine                                | Sigma Aldrich | G8898        |

|                                       |               |           |
|---------------------------------------|---------------|-----------|
| H <sub>3</sub> PO <sub>4</sub>        | Sigma Aldrich | 79617     |
| HCl                                   | POCH          | 575283721 |
| HClO <sub>4</sub>                     | Fluka         | 77228     |
| HEPES                                 | Sigma Aldrich | H4034     |
| HEPES sodium salt                     | Sigma Aldrich | H3784     |
| IgG standard (from human serum)       | Sigma Aldrich | I4506     |
| Isocitrate trisodium salt             | Sigma Aldrich | I1252     |
| Isocitrate dehydrogenase              | Sigma Aldrich | I2002     |
| $\alpha$ -Ketoglutarate disodium salt | Sigma Aldrich | 75892     |
| KCl                                   | POCH          | 739740114 |
| K <sub>2</sub> HPO <sub>4</sub>       | Sigma Aldrich | P5504     |
| KH <sub>2</sub> PO <sub>4</sub>       | Sigma Aldrich | P5655     |
| K <sub>3</sub> PO <sub>4</sub>        | POCH          | 742020112 |
| KHCO <sub>3</sub>                     | Sigma Aldrich | 237205    |
| $\alpha$ -Ketoglutarate               | Sigma Aldrich | 75892     |
| Lactic dehydrogenase (LDH)            | Sigma Aldrich | L-2500    |
| Laemmli Sample Buffer                 | Bio-Rad       | 161-0737  |
| L-Aspartate                           | Sigma Aldrich | A6683     |
| L-Glutamate                           | Sigma Aldrich | G5889     |
| L-Glutamine                           | Sigma Aldrich | G8540     |
| Lithium potassium acetyl phosphate    | Sigma Aldrich | 0,1409    |
| Lithium acetyl-CoA                    | Sigma Aldrich | A2181     |
| Maleic anhydride                      | Fluka         | 63200     |
| Malic acid                            | Sigma Aldrich | M1000     |
| Malate dehydrogenase (MDH)            | Sigma Aldrich | M2634     |
| Mecamylamine hydrochloride            | Sigma Aldrich | M9020     |
| Methanol                              | Sigma Aldrich | 621995156 |
| MnCl <sub>2</sub>                     | Sigma Aldrich | 529680    |
| N-acetylaspartic acid (NAA)           | Sigma Aldrich | A5625     |
| NaCl                                  | POCH          | 794121116 |
| NAD                                   | Sigma Aldrich | N3014     |
| NADH                                  | Sigma Aldrich | N8129     |
| NADPH                                 | Sigma Aldrich | N1630     |
| NaOH                                  | Sigma Aldrich | S8045     |
| Nifedipine                            | Sigma Aldrich | N7634     |
| NH <sub>4</sub> Cl                    | Sigma Aldrich | A9434     |
| Nitrotetrazolium Blue chloride        | Sigma Aldrich | N6876     |
| Penicillin-Streptomycin solution      | Sigma Aldrich | P4333     |
| Phosphotransacetylase (PTA)           | Sigma Aldrich | P2783     |
| POPOP                                 | Sigma Aldrich | P3754     |
| PPO                                   | Sigma Aldrich | D210404   |

|                                    |                 |           |
|------------------------------------|-----------------|-----------|
| Protease inhibitor cocktail        | Sigma Aldrich   | P8340     |
| RNAlater®                          | Sigma Aldrich   | R0901     |
| SDS                                | Sigma Aldrich   | L5750     |
| Silicon oil AR20                   | Sigma Aldrich   | 10836     |
| Silicon oil AR200                  | Sigma Aldrich   | 85419     |
| Sodium oxalate                     | Sigma Aldrich   | 71800     |
| Sodium phosphate                   | Sigma Aldrich   | S0876     |
| Sodium pyruvate                    | Sigma Aldrich   | P2256     |
| Spectra™ Multicolor Protein Ladder | ThermoFisher Sc | 26623     |
| Streptozotocin                     | Sigma Aldrich   | S0130     |
| Sucrose                            | Sigma Aldrich   | S9378     |
| TCA                                | Fluka           | 91228     |
| Tetrabutylammonium hydrogensulfate | Sigma Aldrich   | 155837    |
| Tetraphenylborate sodium           | Sigma Aldrich   | T25402    |
| Theophylline                       | Sigma Aldrich   | T1633     |
| Thiamine pyrophosphate             | Sigma Aldrich   | T4625     |
| Thiobarbituric acid                | Sigma Aldrich   | T5500     |
| Toluene                            | Sigma Aldrich   | 24529     |
| <i>trans</i> -Retinoic acid        | Sigma Aldrich   | R2625     |
| Tris Base                          | Sigma Aldrich   | 252859    |
| Triton X- 100                      | Sigma Aldrich   | T8787     |
| Tween 20                           | Sigma Aldrich   | P9416     |
| ZnCl <sub>2</sub>                  | POCH            | 264170113 |
